# Supplementary material for: The synthesis of calcium arsenate@iron arsenate coating materials and their application for arsenic-containing wastewater treatment
Source: Royal Society of Chemistry journal article supplement (doi:10.1039/c9ra05278j), 2020-01-01
Supplement: c9ra05278j1.pdf [file c9ra05278j1.pdf]

## Supporting Information for

# The Synthesis of Calcium Arsenate/Iron Arsenate Coating Materials and Its Application for Arsenic-containing Wastewater Treatment

### XRD analysis of sample 3 and 4

Sample 3 was  $\text{CaHAsO}_4@FeAsO_4$  which was obtained by the  $FeCl_3$  stability treatment of sample 1 ( $Fe/As=4:1$ ,  $pH=4$ ,  $50\text{ }^\circ\text{C}$ ). Sample 4 was  $\text{Ca}_3(\text{AsO}_4)_2@FeAsO_4$  which was obtained by the  $FeCl_3$  stability treatment of sample 2 ( $Fe/As=4:1$ ,  $pH=4$ ,  $50\text{ }^\circ\text{C}$ ). Sample 3 and sample 4 were measured by XRD. Figure 4 shows the XRD pattern of sample 3 and sample 4. Compared with Figure 1, the characteristic peaks of calcium arsenate disappeared completely. The results indicated the calcium arsenate was coated by  $FeAsO_4$ . The crystalline of  $FeAsO_4$  was low, so the characteristic peaks of  $FeAsO_4$  were not obviously. This was consistent with the previous reports.<sup>1</sup>

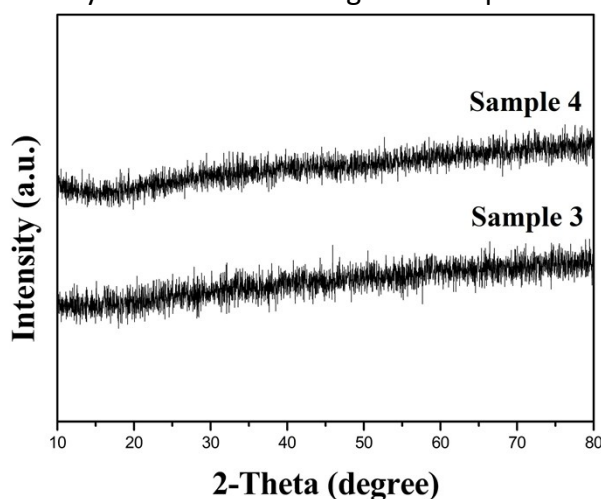

Figure S1. the XRD pattern of sample 3 and sample 4.

### Eds analysis of sample 1 and 3

Figure S2 shows the elemental composition of  $\text{CaHAsO}_4$ . The atom percent of calcium is 49.80%, and the percent of arsenic is 50.20%. It is close to the theoretical ratio 1:1. Iron is not detected.

Figure S3 shows the elemental composition of  $\text{CaHAsO}_4@FeAsO_4$ . The atom percent of iron is 50.57%, and the percent of arsenic is 49.43%. It is close to the theoretical ratio 1:1. Calcium is not detected. The results show the surface of materials should be  $FeAsO_4$ ,  $\text{CaHAsO}_4$  is coated completely. This is consistent with the results of TCLP in the manuscript.

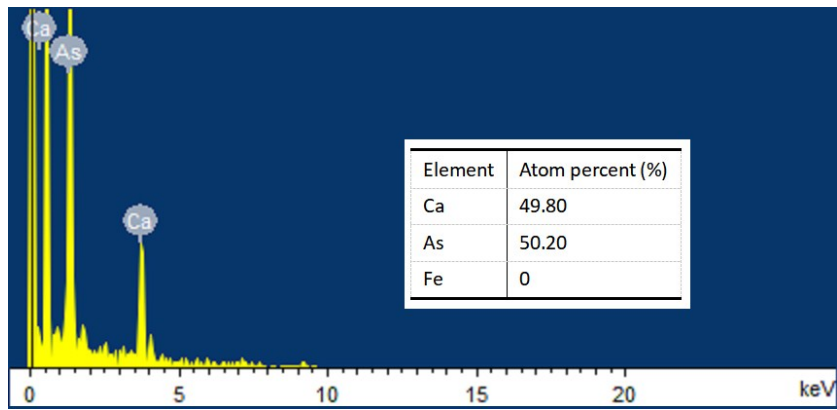

Figure S2. The results of EDS for  $\text{CaHAsO}_4$

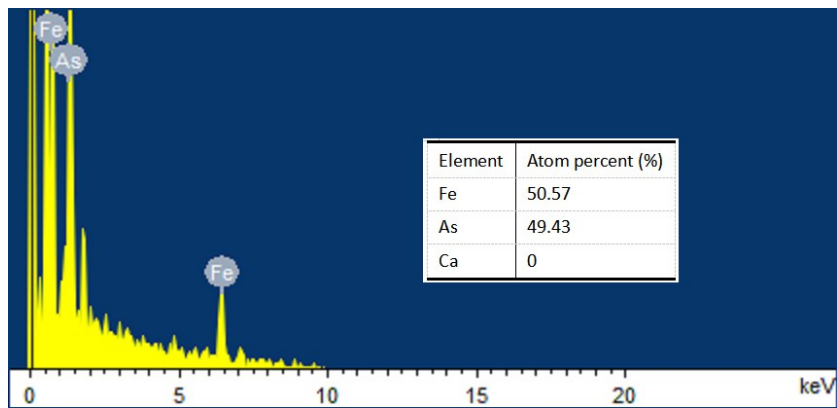

Figure S3. The results of EDS for  $\text{CaHAsO}_4@FeAsO_4$

1. E. Krause and V. Ettel, *Hydrometallurgy*, 1989, **22**, 311-337.
